# Supplementary material for: Prosecution of maritime terrorists : the role of national courts in ensuring accountability
Source: Hindawi journal article supplement (doi:10.1155/2021/6669731), 2013-07-04
Supplement: f1 [file 6669731.f1.zip]

| Gene    | Variant | Chr | Coordinate | Type     | Genotype | Exonic | Quality  | Alt Variant Freq |
|---------|---------|-----|------------|----------|----------|--------|----------|------------------|
| NOTCH2  | T>T/C   | 1   | 120572547  | snv      | het      | yes    | 236.64   | 25.53            |
| NOTCH2  | C>C/T   | 1   | 120572572  | snv      | het      | yes    | 289.64   | 25.45            |
| NOTCH2  | G>G/C   | 1   | 120611964  | snv      | het      | yes    | 5137.64  | 42.83            |
| GCKR    | T>T/C   | 2   | 27730940   | snv      | het      | yes    | 12984.64 | 75.29            |
| NEUROD1 | T>C/C   | 2   | 182543455  | snv      | hom      | yes    | 3021.03  | 92.78            |
| CAPN10  | A>A/G   | 2   | 241536126  | snv      | het      | yes    | 68.64    | 16.67            |
| CAPN10  | T>T/C   | 2   | 241538061  | snv      | het      | yes    | 472.64   | 20.47            |
| CAPN10  | A>G/G   | 2   | 241538074  | snv      | hom      | yes    | 5035.06  | 98.45            |
| ADCY5   | A>A/G   | 3   | 123018963  | snv      | het      | yes    | 1696.64  | 79.12            |
| WFS1    | G>G/A   | 4   | 6302519    | snv      | het      | yes    | 12514.64 | 77.11            |
| WFS1    | G>G/A   | 4   | 6302889    | snv      | het      | yes    | 157.64   | 14.63            |
| CDKAL1  | C>C/T   | 6   | 21065449   | snv      | het      | yes    | 138.64   | 11.78            |
| HLA-B   | C>C/G   | 6   | 31322303   | snv      | het      | yes    | 3397.64  | 55.22            |
| HLA-B   | C>C/T   | 6   | 31322911   | snv      | het      | yes    | 1047.64  | 49.07            |
| HLA-B   | C>C/T   | 6   | 31322980   | snv      | het      | yes    | 816.64   | 47.35            |
| HLA-B   | T>T/C   | 6   | 31323337   | snv      | het      | yes    | 3667.64  | 52.16            |
| HLA-B   | C>C/G   | 6   | 31323953   | snv      | het      | yes    | 7656.64  | 83.33            |
| HLA-B   | G>G/C   | 6   | 31323960   | snv      | het      | yes    | 8381.64  | 85.24            |
| HLA-B   | A>A/G   | 6   | 31323980   | snv      | het      | yes    | 1150.64  | 24.73            |
| HLA-B   | T>A/G   | 6   | 31324003   | snv      | het      | yes    | 6688.1   | 34.67            |
| HLA-B   | C>G/T   | 6   | 31324004   | snv      | het      | yes    | 6695.1   | 34.67            |
| HLA-B   | C>C/A   | 6   | 31324024   | snv      | het      | yes    | 6848.58  | 50.99            |
| HLA-B   | G>G/A   | 6   | 31324025   | snv      | het      | yes    | 485.64   | 16.34            |
| HLA-B   | T>T/A   | 6   | 31324036   | snv      | het      | yes    | 2226.64  | 25.11            |
| HLA-B   | G>G/T   | 6   | 31324100   | snv      | het      | yes    | 5803.64  | 37.63            |
| HLA-B   | G>G/C   | 6   | 31324200   | snv      | het      | yes    | 2900.64  | 61.79            |
| HLA-B   | C>C/G   | 6   | 31324201   | snv      | het      | yes    | 2859.64  | 61.67            |
| HLA-B   | C>C/T   | 6   | 31324506   | snv      | het      | yes    | 1456.64  | 22.08            |
| HLA-B   | C>C/A   | 6   | 31324516   | snv      | het      | yes    | 6461.64  | 74.04            |
| GCK     | G>G/A   | 7   | 44185088   | snv      | het      | yes    | 532.64   | 21.66            |
| PAX4    | T>T/G   | 7   | 127251188  | snv      | het      | yes    | 11347.64 | 75               |
| PAX4    | TA>TA/T | 7   | 127251732  | deletion | het      | yes    | 59.6     | 11.84            |
| SLC30A8 | C>C/T   | 8   | 118184783  | snv      | het      | yes    | 1647.64  | 21.95            |
| GLIS3   | G>G/T   | 9   | 4118111    | snv      | het      | yes    | 264.64   | 78.57            |
| GLIS3   | A>G/G   | 9   | 4118208    | snv      | hom      | yes    | 1456.06  | 100              |
| GPSM1   | T>C/C   | 9   | 139222174  | snv      | hom      | yes    | 116.96   | 100              |
| GRK5    | C>C/T   | 10  | 121140321  | snv      | het      | yes    | 111.64   | 18.05            |
| GRK5    | G>G/A   | 10  | 121196335  | snv      | het      | yes    | 231.64   | 23.21            |
| MOB2    | A>G/G   | 11  | 1507731    | snv      | hom      | yes    | 4310.06  | 93.65            |
| KCNJ11  | C>C/T   | 11  | 17408630   | snv      | het      | yes    | 3709.64  | 48.09            |
| KCNJ11  | T>T/C   | 11  | 17409572   | snv      | het      | yes    | 2078.64  | 53.45            |
| CCND2   | C>C/G   | 12  | 4388084    | snv      | het      | yes    | 635.64   | 32.43            |
| SGCG    | T>T/C   | 13  | 23898509   | snv      | het      | yes    | 7512.64  | 64.5             |
| SGCG    | A>A/G   | 13  | 23898664   | snv      | het      | yes    | 13100.64 | 88.45            |
| TBC1D4  | C>T/T   | 13  | 75884216   | snv      | hom      | yes    | 14192.06 | 95.25            |
| TBC1D4  | G>G/A   | 13  | 75884290   | snv      | het      | yes    | 3129.64  | 37.07            |

|        |       |    |           |     |     |     |         |       |
|--------|-------|----|-----------|-----|-----|-----|---------|-------|
| IRS2   | C>C/T | 13 | 110435231 | snv | het | yes | 1033.64 | 38.62 |
| C2CD4B | A>A/C | 15 | 62456358  | snv | het | yes | 1114.64 | 72.31 |
| HNF4A  | C>C/T | 20 | 43034693  | snv | het | yes | 856.64  | 19.44 |

| Read Depth | Alt Read Depth | Allelic Depths | Transcript     |
|------------|----------------|----------------|----------------|
| 47         | 12             | 35,12          | NM_024408.3    |
| 55         | 14             | 41,14          | NM_024408.3    |
| 558        | 239            | 319,239        | NM_024408.3    |
| 692        | 521            | 171,521        | NM_001486.3    |
| 97         | 90             | 7,90           | NM_002500.4    |
| 36         | 6              | 30,6           | NM_023083.3    |
| 171        | 35             | 136,35         | NM_023083.3    |
| 193        | 190            | 3,190          | NM_023083.3    |
| 91         | 72             | 19,72          | NM_183357.2    |
| 664        | 512            | 152,512        | NM_006005.3    |
| 164        | 24             | 140,24         | NM_006005.3    |
| 518        | 61             | 457,61         | NM_017774.3    |
| 235        | 136            | 99,136         | NM_005514.6    |
| 108        | 53             | 55,53          | NM_005514.6    |
| 77         | 38             | 39,38          | NM_005514.6    |
| 301        | 154            | 147,154        | NM_005514.6    |
| 228        | 190            | 38,190         | NM_005514.6    |
| 244        | 208            | 36,208         | NM_005514.6    |
| 275        | 68             | 207,68         | NM_005514.6    |
| 349        | 138            | 90,138,121     | NM_005514.6    |
| 349        | 138            | 90,138,121     | NM_005514.6    |
| 402        | 205            | 197,205        | NM_005514.6    |
| 410        | 67             | 343,67         | NM_005514.6    |
| 462        | 116            | 346,116        | NM_005514.6    |
| 481        | 181            | 300,181        | NM_005514.6    |
| 123        | 76             | 47,76          | NM_005514.6    |
| 120        | 74             | 46,74          | NM_005514.6    |
| 240        | 53             | 187,53         | NM_005514.6    |
| 262        | 194            | 68,194         | NM_005514.6    |
| 157        | 34             | 123,34         | NM_021223.2    |
| 632        | 474            | 158,474        | NM_006193.2    |
| 228        | 27             | 201,27         | NM_006193.2    |
| 542        | 119            | 423,119        | NM_173851.2    |
| 14         | 11             | 3,11           | NM_001042413.1 |
| 47         | 47             | 0,47           | NM_001042413.1 |
| 5          | 5              | 0,5            | NR_026964.3    |
| 72         | 13             | 59,13          | NM_005308.2    |
| 56         | 13             | 43,13          | NM_005308.2    |
| 189        | 177            | 12,177         | NM_001172223.1 |
| 341        | 164            | 177,164        | NM_000525.3    |
| 174        | 93             | 81,93          | NM_000525.3    |
| 111        | 36             | 75,36          | NM_001759.3    |
| 476        | 307            | 169,307        | NM_000231.2    |
| 563        | 498            | 65,498         | NM_000231.2    |
| 568        | 541            | 27,541         | NM_014832.2    |
| 410        | 152            | 258,152        | NM_014832.2    |

|     |           |                |
|-----|-----------|----------------|
| 145 | 56 89,56  | NM_003749.2    |
| 65  | 47 18,47  | NM_001007595.2 |
| 391 | 76 315,76 | NM_000457.4    |

| Consequence                              | cDNA Position | CDS Position | Protein Position |
|------------------------------------------|---------------|--------------|------------------|
| missense_variant                         | 434           | 137          | 46               |
| missense_variant                         | 409           | 112          | 38               |
| missense_variant                         | 354           | 57           | 19               |
| missense_variant,splice_region_variant   | 1403          | 1337         | 446              |
| missense_variant                         | 380           | 133          | 45               |
| missense_variant                         | 1706          | 1510         | 504              |
| splice_region_variant,intron_variant     |               |              | 0                |
| missense_variant                         | 2192          | 1996         | 666              |
| splice_region_variant,intron_variant     |               |              | 0                |
| missense_variant                         | 1167          | 997          | 333              |
| missense_variant                         | 1537          | 1367         | 456              |
| missense_variant                         | 1393          | 1226         | 409              |
| missense_variant,splice_region_variant   | 1100          | 1046         | 349              |
| missense_variant                         | 1039          | 985          | 329              |
| missense_variant                         | 970           | 916          | 306              |
| missense_variant                         | 706           | 652          | 218              |
| missense_variant                         | 664           | 610          | 204              |
| missense_variant                         | 657           | 603          | 201              |
| missense_variant                         | 637           | 583          | 195              |
| missense_variant                         | 614           | 560          | 187              |
| missense_variant                         | 613           | 559          | 187              |
| missense_variant                         | 593           | 539          | 180              |
| missense_variant                         | 592           | 538          | 180              |
| missense_variant                         | 581           | 527          | 176              |
| missense_variant                         | 517           | 463          | 155              |
| missense_variant                         | 417           | 363          | 121              |
| missense_variant                         | 416           | 362          | 121              |
| missense_variant                         | 356           | 302          | 101              |
| missense_variant                         | 346           | 292          | 98               |
| upstream_gene_variant                    |               |              | 0                |
| missense_variant                         | 1168          | 962          | 321              |
| splice_region_variant,intron_variant     |               |              | 0                |
| missense_variant                         | 1203          | 973          | 325              |
| missense_variant                         | 2080          | 1367         | 456              |
| missense_variant                         | 1983          | 1270         | 424              |
| upstream_gene_variant                    |               |              | 0                |
| splice_region_variant,intron_variant     |               |              | 0                |
| missense_variant                         | 1144          | 911          | 304              |
| missense_variant                         | 218           | 56           | 19               |
| missense_variant                         | 1577          | 1009         | 337              |
| missense_variant                         | 635           | 67           | 23               |
| splice_region_variant,synonymous_variant | 875           | 570          | 190              |
| splice_region_variant,synonymous_variant | 860           | 705          | 235              |
| missense_variant                         | 1015          | 860          | 287              |
| missense_variant                         | 2802          | 2455         | 819              |
| splice_region_variant,intron_variant     |               |              | 0                |

|                                      |      |      |      |
|--------------------------------------|------|------|------|
| missense_variant                     | 3684 | 3170 | 1057 |
| missense_variant                     | 955  | 826  | 276  |
| splice_region_variant,intron_variant |      |      | 0    |

| Amino Acids | Codons  | Transcript HGNC | Canonical | Sift                              |
|-------------|---------|-----------------|-----------|-----------------------------------|
| N/S         | aAt/aGt | NOTCH2          | YES       | tolerated (0.09)                  |
| E/K         | Gaa/Aaa | NOTCH2          | YES       | tolerated (0.05)                  |
| C/W         | tgC/tgG | NOTCH2          | YES       | tolerated (0.18)                  |
| L/P         | cTg/cCg | GCKR            | YES       | tolerated (1)                     |
| T/A         | Acc/Gcc | NEUROD1         | YES       | tolerated (0.78)                  |
| T/A         | Acc/Gcc | CAPN10          | YES       | tolerated (1)                     |
|             |         | CAPN10          | YES       |                                   |
| I/V         | Atc/Gtc | CAPN10          | YES       | tolerated (0.25)                  |
|             |         | ADCY5           | YES       |                                   |
| V/I         | Gtc/Atc | WFS1            | YES       | tolerated (1)                     |
| R/H         | cGc/cAc | WFS1            | YES       | deleterious (0.02)                |
| P/L         | cCa/cTa | CDKAL1          | YES       | deleterious (0)                   |
| C/S         | tGc/tCc | HLA-B           | YES       | tolerated - low confidence (1)    |
| A/T         | Gct/Act | HLA-B           | YES       | tolerated - low confidence (0.05) |
| V/I         | Gtc/Atc | HLA-B           | YES       | tolerated - low confidence (1)    |
| I/V         | Atc/Gtc | HLA-B           | YES       | tolerated - low confidence (0.51) |
| E/Q         | Gag/Cag | HLA-B           | YES       | tolerated - low confidence (1)    |
| D/E         | gaC/gaG | HLA-B           | YES       | tolerated - low confidence (1)    |
| Y/H         | Tac/Cac | HLA-B           | YES       | tolerated - low confidence (0.22) |
| E/A         | gAg/gCg | HLA-B           | YES       | tolerated - low confidence (0.57) |
| E/K         | Gag/Aag | HLA-B           | YES       | tolerated - low confidence (0.71) |
| R/L         | cGg/cTg | HLA-B           | YES       | tolerated - low confidence (0.66) |
| R/W         | Cgg/Tgg | HLA-B           | YES       | tolerated - low confidence (0.2)  |
| E/V         | gAg/gTg | HLA-B           | YES       | tolerated - low confidence (0.65) |
| R/S         | Cgc/Agc | HLA-B           | YES       | tolerated - low confidence (0.09) |
| S/R         | agC/agG | HLA-B           | YES       | tolerated - low confidence (0.79) |
| S/T         | aGc/aCc | HLA-B           | YES       | tolerated - low confidence (0.75) |
| S/N         | aGc/aAc | HLA-B           | YES       | tolerated - low confidence (1)    |
| D/Y         | Gac/Tac | HLA-B           | YES       | tolerated - low confidence (0.62) |
|             |         | MYL7            | YES       |                                   |
| H/P         | cAc/cCc | PAX4            | YES       | tolerated - low confidence (0.3)  |
|             |         | PAX4            | YES       |                                   |
| R/W         | Cgg/Tgg | SLC30A8         | YES       | tolerated (0.08)                  |
| P/Q         | cCa/cAa | GLIS3           | YES       | tolerated (0.91)                  |
| S/P         | Tcg/Ccg | GLIS3           | YES       | tolerated (0.49)                  |
|             |         | DKFZP434A062    | YES       |                                   |
|             |         | GRK5            | YES       |                                   |
| R/H         | cGt/cAt | GRK5            | YES       | deleterious (0.03)                |
| L/P         | cTg/cCg | MOB2            | YES       | tolerated - low confidence (1)    |
| V/I         | Gtc/Atc | KCNJ11          | YES       | tolerated (0.11)                  |
| K/E         | Aag/Gag | KCNJ11          | YES       | tolerated (0.17)                  |
| T           | acC/acG | CCND2           | YES       |                                   |
| L           | ctT/ctC | SGCG            | YES       |                                   |
| N/S         | aAc/aGc | SGCG            | YES       | tolerated (1)                     |
| V/I         | Gta/Ata | TBC1D4          | YES       | tolerated (0.81)                  |
|             |         | TBC1D4          | YES       |                                   |

|     |         |        |     |                  |
|-----|---------|--------|-----|------------------|
| G/D | gGc/gAc | IRS2   | YES | tolerated (0.61) |
| F/V | Ttc/Gtc | C2CD4B | YES | tolerated (0.18) |
|     |         | HNF4A  | YES |                  |



| <b>PolyPhen</b>           | <b>ENSP</b>    | <b>HGVSc</b>             |
|---------------------------|----------------|--------------------------|
| benign (0.42)             | NP_077719.2    | NM_024408.3:c.137A>G     |
| benign (0.028)            | NP_077719.2    | NM_024408.3:c.112G>A     |
| benign (0.013)            | NP_077719.2    | NM_024408.3:c.57C>G      |
| benign (0)                | NP_001477.2    | NM_001486.3:c.1337T>C    |
| benign (0)                | NP_002491.2    | NM_002500.4:c.133A>G     |
| benign (0)                | NP_075571.1    | NM_023083.3:c.1510A>G    |
|                           | NP_075571.1    | NM_023083.3:c.1990-7T>C  |
| benign (0.001)            | NP_075571.1    | NM_023083.3:c.1996A>G    |
|                           | NP_899200.1    | NM_183357.2:c.2900+4T>C  |
| benign (0.001)            | NP_005996.2    | NM_006005.3:c.997G>A     |
| probably damaging (0.995) | NP_005996.2    | NM_006005.3:c.1367G>A    |
| benign (0.062)            | NP_060244.2    | NM_017774.3:c.1226C>T    |
| probably damaging (0.991) | NP_005505.2    | NM_005514.6:c.1046G>C    |
| benign (0.062)            | NP_005505.2    | NM_005514.6:c.985G>A     |
| benign (0.001)            | NP_005505.2    | NM_005514.6:c.916G>A     |
| benign (0.001)            | NP_005505.2    | NM_005514.6:c.652A>G     |
| benign (0)                | NP_005505.2    | NM_005514.6:c.610G>C     |
| benign (0)                | NP_005505.2    | NM_005514.6:c.603C>G     |
| benign (0.027)            | NP_005505.2    | NM_005514.6:c.583T>C     |
| benign (0.025)            | NP_005505.2    | NM_005514.6:c.560A>C     |
| benign (0.024)            | NP_005505.2    | NM_005514.6:c.559G>A     |
| benign (0.013)            | NP_005505.2    | NM_005514.6:c.539G>T     |
| benign (0.017)            | NP_005505.2    | NM_005514.6:c.538C>T     |
| benign (0.027)            | NP_005505.2    | NM_005514.6:c.527A>T     |
| benign (0.007)            | NP_005505.2    | NM_005514.6:c.463C>A     |
| benign (0.05)             | NP_005505.2    | NM_005514.6:c.363C>G     |
| benign (0.001)            | NP_005505.2    | NM_005514.6:c.362G>C     |
| benign (0.002)            | NP_005505.2    | NM_005514.6:c.302G>A     |
| benign (0.14)             | NP_005505.2    | NM_005514.6:c.292G>T     |
|                           | NP_067046.1    |                          |
| benign (0)                | NP_006184.2    | NM_006193.2:c.962A>C     |
|                           | NP_006184.2    | NM_006193.2:c.748-3delT  |
| benign (0.004)            | NP_776250.2    | NM_173851.2:c.973C>T     |
| benign (0)                | NP_001035878.1 | NM_001042413.1:c.1367C>A |
| benign (0)                | NP_001035878.1 | NM_001042413.1:c.1270T>C |
|                           | NP_005299.1    | NM_005308.2:c.149-6C>T   |
| benign (0.013)            | NP_005299.1    | NM_005308.2:c.911G>A     |
| benign (0)                | NP_001165694.1 | NM_001172223.1:c.56T>C   |
| benign (0.015)            | NP_000516.3    | NM_000525.3:c.1009G>A    |
| benign (0)                | NP_000516.3    | NM_000525.3:c.67A>G      |
|                           | NP_001750.1    | NM_001759.3:c.570C>G     |
|                           | NP_000222.1    | NM_000231.2:c.705T>C     |
| benign (0)                | NP_000222.1    | NM_000231.2:c.860A>G     |
| benign (0.001)            | NP_055647.2    | NM_014832.2:c.2455G>A    |
|                           | NP_055647.2    | NM_014832.2:c.2384-3C>T  |

benign (0.025)

benign (0)

NP\_003740.2

NM\_003749.2:c.3170G>A

NP\_001007596.2

NM\_001007595.2:c.826T>G

NP\_000448.3

NM\_000457.4:c.116-5C>T

| HGVSp                      | dbSNP ID    | Conservation Score | Ancestral Allele |
|----------------------------|-------------|--------------------|------------------|
| NP_077719.2:p.Asn46Ser     | rs61788900  | 2.519              |                  |
| NP_077719.2:p.Glu38Lys     | rs61788901  | 0.502              |                  |
| NP_077719.2:p.Cys19Trp     | rs11810554  | 0.738              |                  |
| NP_001477.2:p.Leu446Pro    | rs1260326   | 0.576 C            |                  |
| NP_002491.2:p.Thr45Ala     | rs1801262   | 0.628 C            |                  |
| NP_075571.1:p.Thr504Ala    | rs7607759   | -0.875 a           |                  |
|                            | rs55878652  | -0.622 C           |                  |
| NP_075571.1:p.Ile666Val    | rs2975766   | -1.561 G           |                  |
|                            | rs4482616   | -3.07 G            |                  |
| NP_005996.2:p.Val333Ile    | rs1801212   | 1.481 a            |                  |
| NP_005996.2:p.Arg456His    | rs1801208   | 5.502 g            |                  |
| NP_060244.2:p.Pro409Leu    | rs77152992  | 5.766 C            |                  |
| NP_005505.2:p.Cys349Ser    | rs2308655   | -0.198 G           |                  |
| NP_005505.2:p.Ala329Thr    | rs1051488   | 0.645 C            |                  |
| NP_005505.2:p.Val306Ile    | rs1131500   | -0.99 C            |                  |
| NP_005505.2:p.Ile218Val    | rs1050341   | -1.939 C           |                  |
| NP_005505.2:p.Glu204Gln    | rs1131285   | 0.34 G             |                  |
| NP_005505.2:p.Asp201Glu    | rs1131275   | 0.283 C            |                  |
| NP_005505.2:p.Tyr195His    | rs1050696   | 0.511              |                  |
| NP_005505.2:p.Glu187Ala    | rs2308466   | -4.258 g           |                  |
| NP_005505.2:p.Glu187Lys    | rs2523600   | -1.058 T           |                  |
| NP_005505.2:p.Arg180Leu    | rs697742    | -1.411 N           |                  |
| NP_005505.2:p.Arg180Trp    | rs9266144   | -5.021 G           |                  |
| NP_005505.2:p.Glu176Val    | rs151341293 | -6.462 t           |                  |
| NP_005505.2:p.Arg155Ser    | rs1050654   | -0.762             |                  |
| NP_005505.2:p.Ser121Arg    | rs1140412   | -1.001             |                  |
| NP_005505.2:p.Ser121Thr    | rs1071652   | -2.389             |                  |
| NP_005505.2:p.Ser101Asn    | rs1050388   | -2.034             |                  |
| NP_005505.2:p.Asp98Tyr     | rs1131215   | -2.257             |                  |
|                            | rs2908274   | 0.658 G            |                  |
| NP_006184.2:p.His321Pro    | rs712701    | -1.012 G           |                  |
|                            | rs772936097 |                    |                  |
| NP_776250.2:p.Arg325Trp    | rs13266634  | -0.325 C           |                  |
| NP_001035878.1:p.Pro456Gln | rs6415788   | 1.741 T            |                  |
| NP_001035878.1:p.Ser424Pro | rs806052    | -1.081 G           |                  |
|                            | rs28495820  | 0.032              |                  |
|                            | rs2275036   | 1.139 C            |                  |
| NP_005299.1:p.Arg304His    | rs2230349   | 2.557 G            |                  |
| NP_001165694.1:p.Leu19Pro  | rs1881503   | 1.618 G            |                  |
| NP_000516.3:p.Val337Ile    | rs5215      | -0.594 T           |                  |
| NP_000516.3:p.Lys23Glu     | rs5219      | 0.716 C            |                  |
| NM_001759.3:c.570C>G(p.=)  | rs3217805   | -0.352 C           |                  |
| NM_000231.2:c.705T>C(p.=)  | rs1800353   | -0.065 T           |                  |
| NP_000222.1:p.Asn287Ser    | rs1800354   | 2.747 G            |                  |
| NP_055647.2:p.Val819Ile    | rs1062087   | -0.161 T           |                  |
|                            | rs2297203   | 1.909 G            |                  |

|                            |           |          |
|----------------------------|-----------|----------|
| NP_003740.2:p.Gly1057Asp   | rs1805097 | 0.768    |
| NP_001007596.2:p.Phe276Val | rs8040712 | 0.283 C  |
|                            | rs745975  | -2.141 c |

| Alternate Alleles | Allele Freq | Allele Freq Global Minor | Global Minor Allele | Allele Freq Amr |
|-------------------|-------------|--------------------------|---------------------|-----------------|
| 1                 | 0           | 0                        |                     | 0               |
| 1                 | 0           | 0                        |                     | 0               |
| 1                 | 0           | 0                        |                     | 0               |
| 1                 | 70.67       | 29.33 T                  |                     | 63.83           |
| 2                 | 77.08       | 22.92 T                  |                     | 74.49           |
| 1                 | 11.68       | 11.68 G                  |                     | 12.54           |
| 1                 | 12.04       | 12.04 C                  |                     | 12.68           |
| 2                 | 98.98       | 1.02 A                   |                     | 98.7            |
| 1                 | 80.67       | 19.33 A                  |                     | 79.39           |
| 1                 | 88.44       | 11.56 G                  |                     | 77.67           |
| 1                 | 6.03        | 6.03 A                   |                     | 7.78            |
| 1                 | 8.61        | 8.6 T                    |                     | 4.9             |
| 1                 | 59.22       | 40.77 C                  |                     | 61.67           |
| 1                 | 53.69       | 46.31 T                  |                     | 49.71           |
| 1                 | 54.45       | 45.55 T                  |                     | 50              |
| 1                 | 29.25       | 29.25 T                  |                     | 28.53           |
| 1                 | 81.09       | 18.91 C                  |                     | 84.01           |
| 1                 | 80.23       | 19.77 G                  |                     | 83.29           |
| 1                 | 0           | 0                        |                     | 0               |
| 1                 | 25.88       | 25.88 G                  |                     | 28.82           |
| 1                 | 25.88       | 25.88 T                  |                     | 28.82           |
| 1                 | 49.98       | 40.54 C                  |                     | 48.13           |
| 1                 | 16.69       | 16.69 A                  |                     | 15.27           |
| 1                 | 42.55       | 42.55 A                  |                     | 45.53           |
| 1                 | 0           | 0                        |                     | 0               |
| 1                 | 79.91       | 18.21 G                  |                     | 76.08           |
| 1                 | 14.12       | 14.12 G                  |                     | 10.66           |
| 1                 | 35.64       | 35.64 T                  |                     | 26.94           |
| 1                 | 70.39       | 29.61 C                  |                     | 75.07           |
| 1                 | 41.31       | 41.31 A                  |                     | 30.84           |
| 1                 | 67.05       | 32.95 T                  |                     | 76.08           |
| 1                 | 0           | 0                        |                     | 0               |
| 1                 | 25.52       | 25.52 T                  |                     | 26.66           |
| 1                 | 67.61       | 32.39 G                  |                     | 76.22           |
| 2                 | 99.9        | 0.1 A                    |                     | 100             |
| 2                 | 0           | 0                        |                     | 0               |
| 1                 | 20.51       | 20.51 T                  |                     | 8.79            |
| 1                 | 12.58       | 12.58 A                  |                     | 9.51            |
| 2                 | 94.03       | 5.97 A                   |                     | 88.33           |
| 1                 | 73.06       | 26.94 C                  |                     | 70.32           |
| 1                 | 73.7        | 26.3 T                   |                     | 70.75           |
| 1                 | 21.98       | 21.98 G                  |                     | 27.81           |
| 1                 | 62.98       | 37.02 T                  |                     | 74.93           |
| 1                 | 87.78       | 12.22 A                  |                     | 93.08           |
| 2                 | 71.18       | 28.81 C                  |                     | 66.43           |
| 1                 | 22.6        | 22.6 A                   |                     | 37.32           |

|   |       |         |       |
|---|-------|---------|-------|
| 1 | 28.33 | 28.33 T | 41.07 |
| 1 | 73.44 | 26.56 A | 76.22 |
| 1 | 16.87 | 16.87 T | 12.82 |

| Allele Freq Eas | Allele Freq Sas | Allele Freq Af | Allele Freq Eur | EVS Freq All | EVS Coverage |
|-----------------|-----------------|----------------|-----------------|--------------|--------------|
| 0               | 0               | 0              | 0               | 0            | 0            |
| 0               | 0               | 0              | 0               | 0            | 0            |
| 0               | 0               | 0              | 0               | 0            | 0            |
| 51.88           | 79.96           | 90.62          | 58.95           | 67.59        | 6500         |
| 91.96           | 85.28           | 73.07          | 61.23           | 66.94        | 10700        |
| 9.32            | 21.06           | 2.87           | 15.9            | 12.09        | 2500         |
| 9.32            | 21.06           | 4.16           | 15.9            | 11.79        | 2000         |
| 100             | 99.08           | 99.85          | 96.92           | 97.9         | 2200         |
| 87.5            | 78.43           | 79.12          | 78.93           | 80.09        | 9200         |
| 99.5            | 85.79           | 99.39          | 72.96           | 79.93        | 34000        |
| 7.94            | 7.26            | 3.33           | 5.27            | 4.67         | 7800         |
| 15.67           | 9               | 7.03           | 5.76            | 5            | 9000         |
| 62.6            | 56.03           | 68.53          | 45.03           | 49.55        | 5900         |
| 55.56           | 54.19           | 65.73          | 38.27           | 43.4         | 10100        |
| 57.44           | 55.21           | 66.03          | 38.57           | 43.61        | 7400         |
| 20.34           | 33.03           | 39.94          | 20.97           | 21.88        | 8500         |
| 81.65           | 86.71           | 80.63          | 73.66           | 0            | 0            |
| 80.36           | 86.3            | 79.58          | 72.96           | 46.76        | 1800         |
| 0               | 0               | 0              | 0               | 0            | 0            |
| 15.57           | 26.48           | 28.21          | 30.52           | 0            | 0            |
| 15.57           | 26.48           | 28.21          | 30.52           | 0            | 0            |
| 56.55           | 57.46           | 48.94          | 38.77           | 0            | 0            |
| 24.01           | 18.1            | 11.72          | 15.51           | 0            | 0            |
| 38.39           | 43.66           | 43.04          | 42.94           | 0            | 0            |
| 0               | 0               | 0              | 0               | 0            | 0            |
| 86.81           | 85.79           | 78.06          | 72.36           | 59.74        | 1400         |
| 15.97           | 25.97           | 7.49           | 11.83           | 0            | 0            |
| 27.78           | 45.81           | 40.24          | 33.6            | 16.84        | 4700         |
| 64.19           | 82.92           | 71.63          | 59.54           | 48.17        | 5200         |
| 40.28           | 31.9            | 72.54          | 17.69           | 33.49        | 2200         |
| 35.91           | 73.62           | 72.77          | 78.13           | 76.89        | 4800         |
| 0               | 0               | 0              | 0               | 16.26        | 4200         |
| 45.73           | 25.46           | 7.41           | 28.33           | 22.99        | 8400         |
| 87.4            | 56.03           | 60.06          | 63.02           | 66.93        | 1000         |
| 100             | 100             | 99.62          | 100             | 99.87        | 600          |
| 0               | 0               | 0              | 0               | 0            | 0            |
| 37              | 19.32           | 20.57          | 13.12           | 14.72        | 7700         |
| 28.27           | 20.45           | 0.23           | 7.55            | 7.37         | 6500         |
| 99.8            | 91.1            | 99.39          | 87.97           | 0            | 0            |
| 66.17           | 60.43           | 95.46          | 64.71           | 73.2         | 15200        |
| 66.17           | 60.43           | 97.65          | 64.71           | 73.81        | 6400         |
| 8.33            | 22.6            | 16.79          | 37.87           | 32.63        | 4100         |
| 74.8            | 77.09           | 32.53          | 69.18           | 57.62        | 7900         |
| 99.9            | 93.46           | 70.27          | 89.46           | 82.11        | 6700         |
| 79.56           | 93.35           | 39.79          | 85.78           | 76.5         | 7900         |
| 18.65           | 20.55           | 8.09           | 37.47           | 31.97        | 3800         |

|       |       |       |       |       |       |
|-------|-------|-------|-------|-------|-------|
| 39.28 | 30.26 | 9.38  | 31.61 | 23.26 | 500   |
| 58.53 | 68.3  | 79.35 | 83.7  | 0     | 0     |
| 19.15 | 22.49 | 8.85  | 22.46 | 19.04 | 14700 |



| <b>EVS Samples</b> | <b>ExAC Freq All</b> | <b>ExAC Freq Afr</b> | <b>ExAC Freq Amr</b> | <b>ExAC Freq Eas</b> | <b>ExAC Freq Sas</b> |
|--------------------|----------------------|----------------------|----------------------|----------------------|----------------------|
| 0                  | 47.36                | 32.69                | 46.64                | 48.19                | 49.23                |
| 0                  | 46.99                | 32.29                | 46.73                | 47.7                 | 48.94                |
| 0                  | 44.93                | 28.37                | 43.54                | 47.15                | 45.9                 |
| 6503               | 64.28                | 86.46                | 67.86                | 50.61                | 76.05                |
| 6503               | 70.27                | 73.94                | 77.24                | 91.64                | 85.33                |
| 6004               | 14.74                | 4.42                 | 7.34                 | 9.81                 | 21.95                |
| 6464               | 19.15                | 6.54                 | 13.63                | 12.11                | 21.93                |
| 6468               | 97.99                | 99.58                | 98.62                | 99.96                | 98.78                |
| 6503               | 80.09                | 79.78                | 79.19                | 88.06                | 78.67                |
| 6503               | 78.18                | 95.55                | 81.24                | 99.79                | 84.33                |
| 6503               | 5.7                  | 3.6                  | 5.81                 | 9.2                  | 6.63                 |
| 6503               | 6.55                 | 6.28                 | 4.47                 | 14.86                | 9.95                 |
| 6503               | 52.47                | 64.99                | 67.97                | 62.54                | 55.94                |
| 4220               | 44.27                | 59.75                | 47.76                | 54.16                | 53.24                |
| 4220               | 44.72                | 60.64                | 48.07                | 55.86                | 53.59                |
| 6503               | 23.29                | 33.83                | 30.01                | 21.88                | 35.52                |
| 0                  | 65.4                 | 67.46                | 78.09                | 70.3                 | 76.44                |
| 6105               | 57.69                | 59.81                | 68.35                | 61.62                | 70.37                |
| 0                  | 7.01                 | 4.81                 | 8.73                 | 5.85                 | 14.74                |
| 0                  | 31.87                | 30.39                | 30.39                | 18.86                | 37.32                |
| 0                  | 31.97                | 30.33                | 30.49                | 18.97                | 37.32                |
| 0                  | 50.26                | 49.35                | 53.72                | 60.43                | 55.47                |
| 0                  | 19.67                | 15.15                | 17.22                | 22.95                | 20.95                |
| 0                  | 41.64                | 39.95                | 42.2                 | 39.32                | 42.8                 |
| 0                  | 41.32                | 39.67                | 45.59                | 43.71                | 42.07                |
| 5762               | 65.33                | 62.63                | 65.22                | 85.68                | 71.17                |
| 0                  | 6.98                 | 3.1                  | 7.06                 | 7.46                 | 22.01                |
| 6296               | 22.13                | 25.9                 | 16.7                 | 20.99                | 29.43                |
| 6297               | 59.31                | 61.37                | 72.25                | 63.9                 | 73.17                |
| 6502               | 36.8                 | 69.79                | 44.34                | 50.08                | 32.77                |
| 6502               | 75.78                | 73.22                | 74.23                | 42.02                | 75.54                |
| 6257               | 0                    | 0                    | 0                    | 0                    | 0                    |
| 6503               | 28.49                | 9.12                 | 26.84                | 43.48                | 22.9                 |
| 5571               | 67.3                 | 63.78                | 83.59                | 87.98                | 57.49                |
| 4668               | 99.97                | 99.58                | 100                  | 100                  | 100                  |
| 0                  | 100                  | 100                  | 100                  | 0                    | 100                  |
| 6503               | 15.74                | 17.22                | 7.12                 | 38.84                | 20.73                |
| 6503               | 11.06                | 2.03                 | 10.18                | 26.15                | 19.04                |
| 0                  | 90.26                | 96.81                | 89.67                | 99.49                | 89.29                |
| 6493               | 64.48                | 91.46                | 60.97                | 63.96                | 62.71                |
| 6493               | 64.71                | 93.67                | 61.1                 | 64.01                | 62.75                |
| 6503               | 32.26                | 18.8                 | 29.08                | 8.4                  | 26.14                |
| 6503               | 67.44                | 39.89                | 81.82                | 76.9                 | 71.65                |
| 6503               | 88.17                | 73.94                | 93.8                 | 99.92                | 91.42                |
| 5958               | 82.56                | 47.98                | 68.64                | 81.17                | 93.28                |
| 6052               | 35.75                | 13.66                | 46.56                | 22.07                | 24.61                |

|      |       |       |       |       |       |
|------|-------|-------|-------|-------|-------|
| 5967 | 38.2  | 19.23 | 57.93 | 46.68 | 29.58 |
| 0    | 73.24 | 83.56 | 72.3  | 59.77 | 69.68 |
| 6503 | 20.08 | 9.92  | 9.58  | 17.55 | 23.81 |

| ExAC Freq Fin | ExAC Freq Nfe | ExAC Freq Other | ExAC Coverage | ExAC Samples |
|---------------|---------------|-----------------|---------------|--------------|
| 49.78         | 48.43         | 48.06           | 4900          | 9016         |
| 49.38         | 48.13         | 48.11           | 5100          | 8477         |
| 46.63         | 46.3          | 46.45           | 4400          | 49819        |
| 65.45         | 58.92         | 65.78           | 6800          | 60623        |
| 64.1          | 62.57         | 69.18           | 3800          | 58380        |
| 18.75         | 16.64         | 14.78           | 3800          | 52662        |
| 29.84         | 21.52         | 16.67           | 4100          | 20298        |
| 99.26         | 97.07         | 98.28           | 3900          | 30829        |
| 76.54         | 79.99         | 78.44           | 6200          | 60385        |
| 67.04         | 71.73         | 77.42           | 15100         | 60700        |
| 7.67          | 5.09          | 8.06            | 6900          | 60625        |
| 5.88          | 5.08          | 7.27            | 3600          | 60675        |
| 51.95         | 45.62         | 59.09           | 8400          | 60548        |
| 45.69         | 37.55         | 49.67           | 9100          | 60181        |
| 46.05         | 37.94         | 49.55           | 7400          | 59516        |
| 23.25         | 17.57         | 29.36           | 14700         | 60440        |
| 61.66         | 59.91         | 70.97           | 3300          | 46065        |
| 52.49         | 52.91         | 63.19           | 3500          | 38735        |
| 4.54          | 5.51          | 11.74           | 3400          | 39520        |
| 25.75         | 33.17         | 31.22           | 3800          | 50647        |
| 25.9          | 33.31         | 31.63           | 3800          | 50746        |
| 47.97         | 46.76         | 50.41           | 4400          | 47243        |
| 21.67         | 19.75         | 19.87           | 4200          | 54180        |
| 40.88         | 41.88         | 39.9            | 4800          | 52805        |
| 40.75         | 40.31         | 42.4            | 5500          | 55216        |
| 62.87         | 61.85         | 66.31           | 3600          | 42096        |
| 3.46          | 4.51          | 8.66            | 3100          | 41804        |
| 17.27         | 21.45         | 24.79           | 3200          | 48625        |
| 58.57         | 52.63         | 62.23           | 3600          | 51245        |
| 36.73         | 27.53         | 34.07           | 2600          | 36274        |
| 76.84         | 80.44         | 74.67           | 4200          | 51282        |
| 0             | 0             | 0               | 0             | 0            |
| 37.47         | 30.33         | 29.4            | 9000          | 60624        |
| 69.19         | 62.92         | 65.76           | 2900          | 47984        |
| 100           | 100           | 100             | 2000          | 42013        |
| 0             | 100           | 100             | 41100         | 22           |
| 10.8          | 13.3          | 15.56           | 4700          | 60296        |
| 6.1           | 9.47          | 9.51            | 2900          | 58159        |
| 100           | 90.88         | 87.88           | 6900          | 6167         |
| 52.43         | 62.6          | 63.66           | 11200         | 60674        |
| 52.6          | 62.61         | 63.66           | 10200         | 60556        |
| 35.55         | 39.22         | 29.8            | 3700          | 60296        |
| 67.22         | 67            | 66.89           | 6500          | 60602        |
| 88.15         | 87.1          | 87.08           | 6900          | 60638        |
| 82.51         | 87.57         | 83.11           | 6900          | 60293        |
| 33.4          | 41.86         | 36.42           | 3400          | 56791        |

|       |       |       |       |       |
|-------|-------|-------|-------|-------|
| 48.67 | 43.44 | 36.81 | 4800  | 13273 |
| 81.25 | 81.26 | 77.27 | 4600  | 4410  |
| 18.61 | 23    | 22.03 | 10700 | 60594 |

**COSMIC ID**

COSM3773408: COSM3773409

COSM1736165

COSM132738

COSM4133785

COSM1179689

COSM3766549: COSM3766550

COSM4408390

COSM4419769

COSM328606

COSM4006327

COSM3734025

COSM4160792

COSM3733865: COSM4593100

COSM3733866: COSM4593368

COSM3761864: COSM4690638: COSM4593366

COSM4419059: COSM4593228

COSM4160793

COSM4006329

COSM4160800

COSM2149151

COSM4160810

COSM1443267

COSM5428531: COSM5428532: COSM5428533

COSM4998633: COSM4430576: COSM4426807: COSM1580374: COSM4426808: COSM4430575: COSM4998632

COSM4162621

COSM3750174: COSM3750175

COSM3763944: COSM3763945

COSM4163535

COSM4987658

COSM3765554

COSM5019156

COSM4147635

COSM3999123

COSM147701

COSM3753571

COSM4128319

COSM5469294:COSM5469295:COSM5469296

**COSMIC Allele**

C;C

T

C

C

C

C;C

G

A

T

G

C

G

A;G

G;T

A;-;T

A;C

A

T

C

G

T

A

A;A;A

-;-;A;-;A;-;-

T

T;T

G;G

C

A

C

G

G

T

A

T  
C  
T;T;T



**COSMIC Gene**

NOTCH2;NOTCH2\_ENST00000369342

NOTCH2

NOTCH2

GCKR

NEUROD1

CAPN10\_ENST00000391984;CAPN10

ADCY5

WFS1

HLA-B

HLA-B

HLA-B

HLA-B

HLA-B;HLA-B

HLA-B;HLA-B

HLA-B;HLA-B;HLA-B

HLA-B;HLA-B

HLA-B

HLA-B

HLA-B

HLA-B

HLA-B

HLA-B

GCK;GCK\_ENST00000403799;GCK\_ENST00000395796

PAX4\_ENST00000338516;PAX4\_ENST00000338516;PAX4;PAX4;PAX4\_ENST00000338516;PAX4;PAX4

SLC30A8

GLIS3\_ENST00000381971;GLIS3

GLIS3\_ENST00000381971;GLIS3

GPSM1\_ENST00000392945

GRK5

KCNJ11

CCND2

SGCG

TBC1D4

TBC1D4

IRS2

C2CD4B

HNMF4A;Q8N8C9\_HUMAN;HNMF4A\_ENST00000443598

## COSMIC Primary Site

haematopoietic\_and\_lymphoid\_tissue;upper\_aerodigestive\_tract;haematopoietic\_and\_lymphoid\_tissue;pancreas  
upper\_aerodigestive\_tract;haematopoietic\_and\_lymphoid\_tissue;large\_intestine;central\_nervous\_system;thyroid  
haematopoietic\_and\_lymphoid\_tissue;urinary\_tract;urinary\_tract;upper\_aerodigestive\_tract;haematopoietic\_and  
pancreas;thyroid  
thyroid;prostate

liver;liver

liver

soft\_tissue;haematopoietic\_and\_lymphoid\_tissue

prostate;kidney;soft\_tissue

urinary\_tract;upper\_aerodigestive\_tract;haematopoietic\_and\_lymphoid\_tissue;thyroid  
pancreas;pancreas;thyroid;soft\_tissue;large\_intestine  
upper\_aerodigestive\_tract;thyroid  
pancreas;haematopoietic\_and\_lymphoid\_tissue;thyroid;upper\_aerodigestive\_tract  
pancreas;haematopoietic\_and\_lymphoid\_tissue;thyroid;upper\_aerodigestive\_tract  
upper\_aerodigestive\_tract;thyroid;soft\_tissue;large\_intestine;upper\_aerodigestive\_tract  
haematopoietic\_and\_lymphoid\_tissue;upper\_aerodigestive\_tract;upper\_aerodigestive\_tract  
upper\_aerodigestive\_tract;thyroid;soft\_tissue  
urinary\_tract;upper\_aerodigestive\_tract;haematopoietic\_and\_lymphoid\_tissue;thyroid  
thyroid  
haematopoietic\_and\_lymphoid\_tissue;central\_nervous\_system  
haematopoietic\_and\_lymphoid\_tissue;thyroid;large\_intestine  
soft\_tissue;thyroid;large\_intestine  
haematopoietic\_and\_lymphoid\_tissue;haematopoietic\_and\_lymphoid\_tissue;haematopoietic\_and\_lymphoid\_tis:

pancreas;oesophagus;stomach;oesophagus;central\_nervous\_system;stomach;oesophagus;oesophagus;pancreas  
large\_intestine;thyroid;soft\_tissue;haematopoietic\_and\_lymphoid\_tissue  
thyroid;thyroid  
thyroid;thyroid  
thyroid

soft\_tissue

liver

soft\_tissue

thyroid

haematopoietic\_and\_lymphoid\_tissue

stomach;bone;haematopoietic\_and\_lymphoid\_tissue

thyroid

thyroid;upper\_aerodigestive\_tract

large\_intestine;large\_intestine;large\_intestine

## COSMIC Histology

lymphoid\_neoplasm;carcinoma;haematopoietic\_neoplasm;carcinoma;other;carcinoma;carcinoma;lymphoid\_neo  
carcinoma;haematopoietic\_neoplasm;carcinoma;glioma;other  
lymphoid\_neoplasm;carcinoma;carcinoma;carcinoma;haematopoietic\_neoplasm;glioma;other;haemangioblaston  
carcinoma;other  
other;adenoma

carcinoma;carcinoma

carcinoma

rhabdomyosarcoma;haematopoietic\_neoplasm

carcinoma;carcinoma;haemangioblastoma

carcinoma;carcinoma;haematopoietic\_neoplasm;other  
pancreatic\_intraepithelial\_neoplasia\_(PanIN);carcinoma;other;rhabdomyosarcoma;carcinoma  
carcinoma;other  
pancreatic\_intraepithelial\_neoplasia\_(PanIN);haematopoietic\_neoplasm;other;carcinoma  
pancreatic\_intraepithelial\_neoplasia\_(PanIN);haematopoietic\_neoplasm;other;carcinoma  
carcinoma;other;haemangioblastoma;carcinoma;carcinoma  
haematopoietic\_neoplasm;carcinoma;carcinoma  
carcinoma;other;haemangioblastoma  
carcinoma;carcinoma;haematopoietic\_neoplasm;other  
other  
haematopoietic\_neoplasm;glioma  
haematopoietic\_neoplasm;other;carcinoma  
rhabdomyosarcoma;other;carcinoma  
haematopoietic\_neoplasm;haematopoietic\_neoplasm;haematopoietic\_neoplasm

carcinoma;carcinoma;carcinoma;carcinoma;glioma;carcinoma;carcinoma;carcinoma;carcinoma  
carcinoma;other;rhabdomyosarcoma;haematopoietic\_neoplasm  
other;other  
other;other  
other

rhabdomyosarcoma

carcinoma  
haemangioblastoma

other  
haematopoietic\_neoplasm  
carcinoma;osteosarcoma;haematopoietic\_neoplasm

other  
other;carcinoma  
carcinoma;carcinoma;carcinoma

**ClinVar Accession****ClinVar Alleles**

plasm;carcinoma;haematopoietic\_neoplasm;carcinoma;other;carcinoma;carcinoma

na;carcinoma;carcinoma

RCV000009294.2

C

RCV000038668.7:RCV000155337.1

A:N

RCV000038638.7

A

RCV000117136.2

A

RCV000117896.1

G

RCV000001055.3

T

RCV000117149.2

T

RCV000117148.2

G

RCV000146099.1

T

RCV000009214.3:RCV000009215.3:RCV000020356.1:RCV000146116.2

C

RCV000078407.6

C

RCV000153942.4

G

RCV000118589.2

T

RCV000118588.2

A

RCV000009368.2

T

RCV000117237.2

T



ClinVar Allele Type      ClinVar Significance

germline

germline      benign  
germline      benign

germline      likely benign  
germline      benign

germline  
germline      likely benign  
germline      likely benign

germline      benign  
germline      drug response:benign

germline      benign  
germline      benign  
germline      likely benign  
germline      likely benign

germline

germline                      likely benign

**ClinVar Disease Name**

Fasting\_plasma\_glucose\_level\_quantitative\_trait\_locus\_5

DIABETES\_MELLITUS,\_TYPE\_2,\_SUSCEPTIBILITY\_TO

Diabetes\_mellitus\_type\_2:Exercise\_stress\_response,\_impaired,\_association\_with:Permanent\_neonatal\_diabetes

DIABETES,\_TYPE\_II,\_SUSCEPTIBILITY\_TO

ClinVar MedGen

ClinVar OMIM

ClinVar Orphanet

ClinVar GeneReviews

C3150714

613463

CN169374:CN169374  
CN169374

CN169374  
CN169374

CN169374  
CN169374

CN169374  
C0011860:C3152078:C1833104:CN169374 125853:606176

CN169374  
CN169374  
CN169374  
CN169374

CN169374

| ClinVar SnoMedCt ID | Regulatory Feature              | Google Scholar | PubMed | UCSC Browser |
|---------------------|---------------------------------|----------------|--------|--------------|
|                     | ENSR00001524148                 | google         | pubmed | ucsc         |
|                     | ENSR00001524148                 | google         | pubmed | ucsc         |
|                     | ENSR00001524164                 | google         | pubmed | ucsc         |
|                     |                                 | google         | pubmed | ucsc         |
|                     |                                 | google         | pubmed | ucsc         |
|                     |                                 | google         | pubmed | ucsc         |
|                     |                                 | google         | pubmed | ucsc         |
|                     |                                 | google         | pubmed | ucsc         |
|                     |                                 | google         | pubmed | ucsc         |
|                     |                                 | google         | pubmed | ucsc         |
|                     |                                 | google         | pubmed | ucsc         |
|                     | ENSR00001213163                 | google         | pubmed | ucsc         |
|                     | ENSR00000487828                 | google         | pubmed | ucsc         |
|                     | ENSR00000487828                 | google         | pubmed | ucsc         |
|                     | ENSR00000487828                 | google         | pubmed | ucsc         |
|                     | ENSR00000487828                 | google         | pubmed | ucsc         |
|                     | ENSR00000487828                 | google         | pubmed | ucsc         |
|                     | ENSR00000487828                 | google         | pubmed | ucsc         |
|                     | ENSR00000487828                 | google         | pubmed | ucsc         |
|                     | ENSR00000487828                 | google         | pubmed | ucsc         |
|                     | ENSR00000487828                 | google         | pubmed | ucsc         |
|                     | ENSR00000487828                 | google         | pubmed | ucsc         |
|                     | ENSR00000487828                 | google         | pubmed | ucsc         |
|                     | ENSR00000487828                 | google         | pubmed | ucsc         |
|                     | ENSR00000487828                 | google         | pubmed | ucsc         |
|                     | ENSR00000487828                 | google         | pubmed | ucsc         |
|                     | ENSR00000487828                 | google         | pubmed | ucsc         |
|                     | ENSR00000487828                 | google         | pubmed | ucsc         |
|                     | ENSR00000487828                 | google         | pubmed | ucsc         |
|                     | ENSR00001559496                 | google         | pubmed | ucsc         |
|                     |                                 | google         | pubmed | ucsc         |
|                     |                                 | google         | pubmed | ucsc         |
|                     |                                 | google         | pubmed | ucsc         |
|                     | ENSR00001816392;ENSR00001816393 | google         | pubmed | ucsc         |
|                     | ENSR00001816393                 | google         | pubmed | ucsc         |
|                     | ENSR00001827266                 | google         | pubmed | ucsc         |
|                     |                                 | google         | pubmed | ucsc         |
|                     |                                 | google         | pubmed | ucsc         |
|                     | ENSR00001613897                 | google         | pubmed | ucsc         |
|                     | ENSR00001615863                 | google         | pubmed | ucsc         |
| 44054006            |                                 | google         | pubmed | ucsc         |
|                     |                                 | google         | pubmed | ucsc         |
|                     |                                 | google         | pubmed | ucsc         |
|                     |                                 | google         | pubmed | ucsc         |
|                     |                                 | google         | pubmed | ucsc         |
|                     | ENSR00001641968                 | google         | pubmed | ucsc         |

ENSR00000409202

google  
google  
google

pubmed ucsc  
pubmed ucsc  
pubmed ucsc
