# Supplementary material for: Prosecution of maritime terrorists : the role of national courts in ensuring accountability
Source: Hindawi journal article supplement (doi:10.1155/2021/6669731), 2013-07-04
Supplement: f1 [file 6669731.f1.zip]

| HLA loci | HLA allele  | Frequency       | tagSNP      | Allele |
|----------|-------------|-----------------|-------------|--------|
| HLA-A    | A_01        | 0.03705         | rs74655243  | A      |
|          | A_0101      | 0.03583         | rs1611703   | G      |
|          | A_02        | 0.30250         | rs80316590  | T      |
|          | A_0203      | 0.02437         | rs79172458  | C      |
|          | A_0206      | 0.05674         | rs117371967 | C      |
|          | A_0207      | 0.07335         | rs79073194  | G      |
|          | A_0209      | 0.00065         | rs41540417  | A      |
|          | A_0217      | 0.00014         | rs41548614  | T      |
|          | A_03        | 0.03452         | rs112708984 | T      |
|          | A_0301      | 0.03214         | rs112763429 | C      |
|          | A_11        | 0.20630         | rs41551619  | A      |
|          | A_1101      | 0.18570         | rs41547618  | A      |
|          | A_1102      | 0.01642         | rs41549014  | A      |
|          | A_23/A_2301 | 0.00234/0.0023  | rs75326938  | A      |
|          | A_24/A_2402 | 0.1645/0.1573   | rs114398126 | T      |
|          | A_26/A_2601 | 0.0278/0.0272   | rs112946903 | T      |
|          | A_2602      | 0.00033         | rs80183706  | A      |
|          | A_29        | 0.01015         | rs41554614  | T      |
|          | A_2901      | 0.00950         | rs41560216  | C      |
|          | A_30        | 0.06820         | rs78160437  | A      |
|          | A_3001      | 0.06670         | rs79293993  | A      |
|          | A_3002      | 0.00042         | rs1059537   | C      |
|          | A_31/A_3101 | 0.03639/0.0363  | rs17179220  | A      |
|          | A_32/A_3201 | 0.01506/0.01506 | rs9258762   | A      |
|          | A_33/A_3303 | 0.08242/0.08032 | rs76748682  | T      |
|          | A_3301      | 0.00211         | rs41557315  | G      |
|          | A_34/A_3401 | 0.00078/0.00078 | rs80145049  | A      |
|          | A_68        | 0.00861         | rs41562917  | T      |
|          | A_6801      | 0.00805         | rs41540517  | G      |
|          | A_6802      | 0.00033         | rs41545116  | A      |
|          | A_7401      | 0.00014         | rs76828561  | A      |
|          | B_07        | 0.03195         | rs115289647 | T      |
|          | B_0702      | 0.02315         | rs2596533   | C      |
|          | B_0705      | 0.00763         | 31452307    | C      |
|          | B_08/B_0801 | 0.00875/0.00875 | rs2523584   | G      |
|          | B_13        | 0.11370         | rs71563315  | A      |
|          | B_1301      | 0.04257         | rs117901686 | G      |
|          | B_1302      | 0.07110         | rs80317258  | T      |
|          | B_14        | 0.00402         | rs41555513  | A      |
|          | B_1502      | 0.02498         | 31451122    | A      |
|          | B_1511      | 0.02049         | 31474735    | G      |
|          | B_1512      | 0.00136         | rs41551517  | C      |
|          | B_1513      | 0.00028         | 31430759    | A      |
|          | B_1518      | 0.01637         | rs117667673 | T      |

|       |             |                  |             |   |
|-------|-------------|------------------|-------------|---|
| HLA-B | B_1519      | 0.00019          | rs41545517  | A |
|       | B_1527      | 0.00893          | rs41562013  | A |
|       | B_18        | 0.00388          | rs9266175   | T |
|       | B_1801      | 0.00360          | rs9266183   | C |
|       | B_27        | 0.02334          | rs76334813  | T |
|       | B_2704      | 0.01048          | rs41553413  | C |
|       | B_2705      | 0.00908          | rs41558317  | G |
|       | B_3502      | 0.00239          | rs41558819  | A |
|       | B_37/B_3701 | 0.01413/0.01413  | rs3819276   | T |
|       | B_3801      | 0.00535          | rs147748716 | T |
|       | B_39/B_3901 | 0.02030/0.01735  | rs41552422  | A |
|       | B_4001      | 0.09594          | rs1131168   | C |
|       | B_41        | 0.00103          | rs41544517  | T |
|       | B_44        | 0.03784          | rs9266195   | T |
|       | B_4402      | 0.00861          | rs112812799 | C |
|       | B_4403      | 0.02821          | rs113858764 | T |
|       | B_45/B_4501 | 0.001403/0.00140 | rs16899066  | C |
|       | B_46/B_4601 | 0.07882/0.07882  | rs41546313  | C |
|       | B_47/B_4701 | 0.000327/0.00032 | rs41553914  | A |
|       | B_48/B_4801 | 0.03293/0.02966  | rs2308488   | T |
|       | B_49/B_4901 | 0.00168/0.00168  | rs77855453  | T |
|       | B_50/B_5001 | 0.00650/0.00650  | rs41552112  | A |
|       | B_51        | 0.07045          | rs1050502   | A |
|       | B_5142      | 0.00173          | rs41545013  | C |
|       | B_54/B_5401 | 0.03106/0.03106  | rs41547515  | C |
|       | B_57/B_5701 | 0.01338/0.01338  | rs41557415  | G |
|       | B_58/B_5801 | 0.04902/0.04902  | rs75412754  | C |
|       | B_81/B_8101 | 0.00042/0.00042  | rs41556216  | A |
|       | C_01        | 0.15120          | rs41557015  | A |
|       | C_0102      | 0.14100          | rs2074494   | T |
|       | C_0106      | 0.00098          | rs112170844 | A |
|       | C_0108      | 0.00023          | rs41551019  | A |
|       | C_02/C_0202 | 0.00865/0.0086   | rs41562921  | T |
|       | C_03        | 0.22070          | rs34592426  | C |
|       | C_0302      | 0.05188          | rs74703819  | T |
|       | C_0303      | 0.07901          | rs1131122   | T |
|       | C_0304      | 0.08897          | rs35840219  | C |
|       | C_04        | 0.06708          | rs41561715  | T |
|       | C_0401      | 0.06016          | rs41547312  | T |
|       | C_0403      | 0.00575          | 31351531    | A |
|       | C_05/C_0501 | 0.00818/0.00790  | rs9264769   | A |
|       | C_06/C_0602 | 0.1052/0.1052    | rs4406273   | A |
|       | C_07        | 0.17030          | rs9264608   | A |
|       | C_0701      | 0.00561          | rs77326983  | C |
|       | C_0702      | 0.14460          | rs76203972  | C |

|                 |                   |                 |             |   |
|-----------------|-------------------|-----------------|-------------|---|
| <i>HLA-C</i>    | C_0704            | 0.00978         | rs77138865  | A |
|                 | C_0706            | 0.00842         | rs41542414  | T |
|                 | C_0766            | 0.00117         | rs74500356  | T |
|                 | C_0767            | 0.00014         | rs75032224  | A |
|                 | C_08              | 0.10830         | rs11547346  | G |
|                 | C_0802            | 0.00370         | rs41544520  | T |
|                 | C_0803            | 0.00917         | rs111613560 | T |
|                 | C_0822            | 0.01272         | rs76294545  | T |
|                 | C_1202            | 0.03639         | rs111254458 | A |
|                 | C_1203            | 0.01637         | rs41553316  | A |
|                 | C_14              | 0.05754         | rs72558161  | C |
|                 | C_1402            | 0.04303         | rs76235944  | T |
|                 | C_1403            | 0.01431         | rs117113479 | G |
|                 | C_15              | 0.04626         | rs41561913  | A |
|                 | C_1502            | 0.03733         | rs1065406   | T |
|                 | C_1505            | 0.00781         | rs41543119  | A |
|                 | C_1513            | 0.00019         | rs41547622  | G |
|                 | C_16              | 0.00257         | rs28367580  | G |
|                 | C_17/C_1701       | 0.00103/0.00103 | rs41544314  | T |
|                 | DRB1_01           | 0.02390         | rs17885011  | T |
|                 | DRB1_0101         | 0.02175         | rs112460460 | A |
|                 | DRB1_03           | 0.04584         | rs9269941   | T |
|                 | DRB1_0301         | 0.04289         | rs67476479  | C |
|                 | DRB1_0317         | 0.00253         | rs17884787  | C |
|                 | DRB1_04           | 0.11080         | rs17879020  | A |
|                 | DRB1_0405         | 0.04411         | rs117433623 | G |
|                 | DRB1_0406         | 0.02517         | 32365630    | C |
|                 | DRB1_07/DRB1_0701 | 0.09150/0.0915  | rs17885382  | T |
|                 | DRB1_08           | 0.07662         | rs78817721  | A |
|                 | DRB1_0803         | 0.06900         | 32551980    | C |
|                 | DRB1_09/DRB1_0901 | 0.15325/0.15325 | rs17884840  | A |
|                 | DRB1_10/DRB1_1001 | 0.01492/0.01492 | rs3205588   | T |
|                 | DRB1_11/DRB1_1101 | 0.06465/0.05726 | rs1059584   | T |
| <i>HLA-DRB1</i> | DRB1_12           | 0.11290         | rs17884840  | T |
|                 | DRB1_1210         | 0.00309         | rs17878475  | T |
|                 | DRB1_13           | 0.05544         | rs113096319 | T |
|                 | DRB1_1301         | 0.01497         | rs115427852 | G |
|                 | DRB1_1302         | 0.03541         | rs116103474 | A |
|                 | DRB1_1312         | 0.00449         | rs35067512  | G |
|                 | DRB1_14           | 0.06563         | rs1059615   | C |
|                 | DRB1_1405         | 0.02250         | rs17879981  | T |
|                 | DRB1_15           | 0.15756         | rs9270299   | A |
|                 | DRB1_1501         | 0.12740         | rs113397833 | A |

|                 |                   |                 |             |   |
|-----------------|-------------------|-----------------|-------------|---|
| <i>HLA-DQB1</i> | DRB1_1502         | 0.02910         | rs116980366 | G |
|                 | DRB1_16           | 0.02699         | rs116602178 | G |
|                 | DRB1_1602         | 0.02615         | rs116502595 | T |
|                 | DQB1_02           | 0.12500         | rs1130370   | T |
|                 | DQB1_0201         | 0.04168         | rs1794280   | T |
|                 | DQB1_0202         | 0.08331         | rs2647032   | C |
|                 | DQB1_03           | 0.42470         | rs1130380   | G |
|                 | DQB1_0301         | 0.20600         | rs1049058   | A |
|                 | DQB1_0302         | 0.05552         | rs113588380 | T |
|                 | DQB1_0303         | 0.16160         | rs114662434 | T |
|                 | DQB1_04           | 0.04760         | rs1130391   | T |
|                 | DQB1_0401         | 0.03345         | rs41540813  | A |
|                 | DQB1_05           | 0.14340         | rs79326791  | G |
|                 | DQB1_0501         | 0.04542         | rs1049074   | T |
|                 | DQB1_0502         | 0.05510         | rs76051596  | G |
|                 | DQB1_0503         | 0.04285         | rs1794281   | G |
|                 | DQB1_06           | 0.25930         | rs1049062   | G |
|                 | DQB1_0601         | 0.09379         | rs3204379   | T |
|                 | DQB1_0602         | 0.10690         | rs1049062   | A |
|                 | DQB1_0603         | 0.01703         | rs113791489 | T |
| <i>HLA-DQA1</i> | DQB1_0604         | 0.01852         | rs17206126  | C |
|                 | DQA1_01           | 0.57670         | rs80318326  | T |
|                 | DQA1_0101         | 0.05370         | rs4476870   | G |
|                 | DQA1_0102         | 0.27860         | rs80176586  | A |
|                 | DQA1_0103         | 0.13400         | rs36219699  | A |
|                 | DQA1_0104         | 0.08687         | rs35087390  | A |
|                 | DQA1_02/DQA1_0201 | 0.07277/0.07277 | rs1142326   | A |
|                 | DQA1_03           | 0.18470         | rs12722074  | A |
|                 | DQA1_0302         | 0.10170         | rs12722040  | C |
|                 | DQA1_04/DQA1_0401 | 0.00523/0.00523 | rs1142338   | T |
|                 | DQA1_05           | 0.10760         | rs9279910   | G |
|                 | DQA1_0505         | 0.06184         | rs1047992   | A |
|                 | DQA1_0506         | 0.00290         | rs41555012  | G |
|                 | DQA1_0508         | 0.00547         | rs41544114  | T |
|                 | DQA1_0509         | 0.00042         | rs41545012  | A |
|                 | DQA1_06/DQA1_0601 | 0.0530/0.0530   | rs1048134   | G |
|                 | DPB1_02           | 0.25350         | rs2295119   | T |
|                 | DPB1_0202         | 0.05609         | rs118044406 | G |
|                 | DPB1_0401         | 0.10600         | rs2068205   | T |
|                 | DPB1_0402         | 0.05019         | rs76893992  | A |
| <i>HLA-DPB1</i> | DPB1_05/DPB1_0501 | 0.3686/0.3686   | rs80315764  | T |
|                 | DPB1_09/DPB1_0901 | 0.01431/0.01431 | rs115910061 | T |
|                 | DPB1_13/DPB1_1301 | 0.04519/0.03527 | rs112248439 | A |
|                 | DPB1_15/DPB1_1501 | 0.00182/0.00182 | rs41559424  | T |

|                 |                   |                 |             |   |
|-----------------|-------------------|-----------------|-------------|---|
|                 | DPB1_17/DPB1_1701 | 0.04603/0.04603 | rs16868789  | G |
|                 | DPB1_19/DPB1_1901 | 0.00763/0.00763 | rs114283055 | A |
|                 | DPB1_21/DPB1_2101 | 0.01137/0.01137 | rs117239359 | T |
|                 | DPB1_26/DPB1_2601 | 0.0022/0.0022   | rs41545021  | A |
|                 | MICA_002:01       | 0.1388          | rs79366716  | C |
|                 | MICA_004          | 0.03401         | rs9295989   | C |
|                 | MICA_008:01       | 0.14            | rs3128981   | G |
|                 | MICA_008:04       | 0.1154          | rs77577410  | G |
|                 | MICA_009:02       | 0.006783        | rs6912525   | C |
| <i>MICA</i>     | MICA_010:01       | 0.1828          | rs2263323   | T |
|                 | MICA_012:01       | 0.05983         | rs114905838 | C |
|                 | MICA_027          | 0.08228         | rs115368838 | C |
|                 | MICA_045          | 0.0508          | rs115827739 | G |
|                 | MICA_049          | 0.03822         | rs80218014  | C |
|                 | MICA_071          | 0.01305         | 31490474    | A |
|                 | DPA1_01/DPA1_0103 | 0.3939/0.3939   | rs1042434   | G |
|                 | DPA1_02           | 0.59890         | rs2308911   | G |
| <i>HLA-DPA1</i> | DPA1_0201         | 0.11350         | rs1042177   | T |
|                 | DPA1_0202         | 0.48540         | rs41552628  | T |
|                 | DPA1_03/DPA1_0301 | 0.00112/0.00112 | rs2308917   | G |
|                 | DPA1_04/DPA1_0401 | 0.00608/0.00608 | rs41548220  | A |
|                 | MICB_003          | 0.03752         | rs41293887  | A |
|                 | MICB_004:01       | 0.09131         | rs3132465   | G |
| <i>MICB</i>     | MICB_005:03       | 0.04949         | rs76329749  | A |
|                 | MICB_005:06       | 0.00711         | rs115339407 | A |
|                 | MICB_008          | 0.0557          | rs3134900   | G |
|                 | MICB_014          | 0.0356          | rs41273040  | A |
|                 | DMB_01:01         | 0.646           | rs1042337   | A |
| <i>HLA-DMB</i>  | DMB_01:03         | 0.332           | rs1042337   | G |
|                 | DMB_01:07         | 0.01736         | rs6920593   | A |
|                 | DOA_01:01:01      | 0.3545          | rs378352    | A |
| <i>HLA-DOA</i>  | DOA_01:01:02      | 0.4456          | rs365066    | C |
|                 | DOA_01:01:04      | 0.1828          | rs6913008   | T |
|                 | DOA_01:02         | 0.008373        | 33087093    | C |
|                 | DOB_01:01:01      | 0.05714         | rs7383287   | G |
|                 | DOB_01:02         | 0.07208         | rs9784869   | T |
| <i>HLA-DOB</i>  | DOB_01:03         | 0.005145        | rs2857105   | C |
|                 | DOB_01:04         | 0.0762          | rs2070120   | A |
|                 | DOB_01:05         | 0.0203          | rs28724895  | C |
|                 | DRA_01:01:01      | 0.7172          | rs8084      | C |
| <i>HLA-DRA</i>  | DRA_01:01:02      | 0.01681         | rs11544315  | T |
|                 | DRA_01:02:02      | 0.2494          | rs7192      | T |
|                 | DRA_01:02:03      | 0.01656         | rs3135391   | A |
| <i>HLA-E</i>    | E_01:01:01        | 0.4023          | rs1264457   | A |
|                 | E_01:03:02        | 0.3076          | rs1059510   | T |
|                 | F_01:01:01        | 0.4367          | rs113770962 | G |

|              |               |         |             |   |
|--------------|---------------|---------|-------------|---|
| <i>HLA-F</i> | F_01:01:02    | 0.1985  | rs2076183   | A |
|              | F_01:01:03    | 0.3245  | rs1736922   | T |
|              | F_01:03:01    | 0.03977 | rs1736924   | C |
|              | G_01:01:01    | 0.403   | rs1130363   | A |
|              | G_01:01:03    | 0.1274  | rs3873252   | T |
|              | G_01:01:12    | 0.01423 | rs9258495   | T |
| <i>HLA-G</i> | G_01:03:01    | 0.0109  | rs41551813  | T |
|              | G_01:04:01    | 0.2228  | rs12722477  | A |
|              | G_01:05N      | 0.0635  | rs56314023  | A |
|              | G_01:06       | 0.03634 | rs12722482  | T |
|              | H_01:01       | 0.4909  | rs113058541 | A |
|              | H_01:02       | 0.05936 | rs7768484   | T |
| <i>HLA-H</i> | H_02:01       | 0.04818 | rs116722566 | C |
|              | H_02:02       | 0.01478 | rs2524026   | A |
|              | H_02:03       | 0.01595 | rs9258788   | T |
|              | H_02:04       | 0.1987  | rs9259290   | T |
|              | H_02:05       | 0.109   | rs112003535 | T |
|              | K_01:01:01    | 0.5452  | rs438610    | C |
| <i>HLA-K</i> | K_01:02       | 0.4132  | rs112201735 | C |
|              | K_01:03       | 0.01247 | rs114214384 | A |
|              | L_01:01:01    | 0.5586  | rs113471469 | G |
| <i>HLA-L</i> | L_01:01:02    | 0.06183 | rs3129697   | G |
|              | L_01:02       | 0.3796  | rs111858555 | G |
| <i>HLA-P</i> | P_01:01       | 0.1724  | rs112697085 | T |
|              | P_02:01       | 0.8147  | rs1077433   | G |
| <i>TAP1</i>  | TAP1_01:01    | 0.7561  | rs12527715  | T |
|              | TAP1_02:01    | 0.1644  | rs4711312   | G |
|              | TAP2_01:03    | 0.02468 | rs4148876   | A |
| <i>TAP2</i>  | TAP2_01:04    | 0.1741  | rs104893997 | T |
|              | TAP2_02:01:01 | 0.01439 | rs1042116   | A |
|              | TAP2_02:01:02 | 0.2889  | rs241441    | C |

| Frequency | Rsquare | Equivalent(r <sup>2</sup> ≥0. | Disease related with type                         |
|-----------|---------|-------------------------------|---------------------------------------------------|
| 0.03688   | 1       | 115                           |                                                   |
| 0.03621   | 0.987   | 115                           |                                                   |
| 0.30330   | 1.000   | 129                           | primary nodal generalized                         |
| 0.02409   | 0.924   | 1                             | osteoarthritis, ovarian cancer, chronic hepatitis |
| 0.06282   | 0.834   | 3                             |                                                   |
| 0.07372   | 1.000   | 8                             |                                                   |
| 0.00066   | 1.000   | 1                             |                                                   |
| 0.00014   | 1.000   | 1                             |                                                   |
| 0.03471   | 1.000   | 149                           |                                                   |
| 0.03467   | 0.931   | 73                            |                                                   |
| 0.20480   | 1.000   | 66                            |                                                   |
| 0.20480   | 0.894   | 16                            |                                                   |
| 0.01651   | 1.000   | 2                             |                                                   |
| 0.00236   | 1.000   | 1                             |                                                   |
| 0.16380   | 0.994   | 179                           |                                                   |
| 0.02844   | 0.973   | 100                           |                                                   |
| 0.00033   | 1.000   | 2                             |                                                   |
| 0.01023   | 1.000   | 119                           |                                                   |
| 0.00958   | 1.000   | 123                           | retinopathy                                       |
| 0.06712   | 1.000   | 165                           |                                                   |
| 0.06594   | 0.994   | 179                           |                                                   |
| 0.00042   | 1.000   | 2                             |                                                   |
| 0.03691   | 0.972   | 14                            | carbamazepine                                     |
| 0.01502   | 0.997   | 133                           |                                                   |
| 0.08014   | 0.980   | 70                            |                                                   |
| 0.00212   | 1.000   | 2                             |                                                   |
| 0.00080   | 1.000   | 3                             |                                                   |
| 0.00840   | 1.000   | 16                            |                                                   |
| 0.00807   | 1.000   | 17                            |                                                   |
| 0.00033   | 1.000   | 1                             |                                                   |
| 0.00014   | 1.000   | 1                             |                                                   |
| 0.03391   | 0.900   | 9                             | alzheimer's disease, osteoporosis                 |
| 0.02537   | 0.864   | 3                             |                                                   |
| 0.00819   | 0.921   | 38                            |                                                   |
| 0.00875   | 1.000   | 75                            | Sjogren's syndrome, early onset myasthenia gravis |
| 0.11390   | 1.000   | 18                            |                                                   |
| 0.04332   | 0.962   | 131                           |                                                   |
| 0.07003   | 0.971   | 75                            |                                                   |
| 0.00403   | 1.000   | 5                             |                                                   |
| 0.02503   | 0.957   | 18                            | epilepsy, lamotrigine induced sjs/ten             |
| 0.02205   | 0.895   | 3                             |                                                   |
| 0.00145   | 0.871   | 2                             |                                                   |
| 0.00028   | 1.000   | 1                             |                                                   |
| 0.01834   | 0.857   | 2                             |                                                   |

|         |       |     |                                                        |
|---------|-------|-----|--------------------------------------------------------|
| 0.00019 | 1.000 | 1   |                                                        |
| 0.00928 | 0.964 | 1   |                                                        |
| 0.00385 | 1.000 | 4   |                                                        |
| 0.00385 | 0.926 | 4   |                                                        |
| 0.02068 | 0.866 | 3   | Acute anterior uveitis,ankylosing spondylitis          |
| 0.01139 | 0.917 | 4   |                                                        |
| 0.00952 | 0.950 | 32  |                                                        |
| 0.00239 | 1.000 | 1   | hypertension                                           |
| 0.01416 | 1.000 | 29  |                                                        |
| 0.00560 | 0.918 | 3   |                                                        |
| 0.01819 | 0.957 | 1   |                                                        |
| 0.09616 | 1.000 | 49  |                                                        |
| 0.00103 | 1.000 | 1   |                                                        |
| 0.03760 | 1.000 | 6   |                                                        |
| 0.00903 | 0.932 | 13  |                                                        |
| 0.03205 | 0.856 | 8   |                                                        |
| 0.00141 | 1.000 | 1   |                                                        |
| 0.07877 | 1.000 | 6   |                                                        |
| 0.00033 | 1.000 | 4   |                                                        |
| 0.03188 | 0.945 | 34  |                                                        |
| 0.00169 | 1.000 | 1   |                                                        |
| 0.00642 | 1.000 | 14  |                                                        |
| 0.07052 | 1.000 | 9   | Behçet's disease,papillary thyroid carcinoma,cleft lip |
| 0.00174 | 1.000 | 1   |                                                        |
| 0.03113 | 1.000 | 6   |                                                        |
| 0.01341 | 1.000 | 48  | Abacavir hypersensitivity,flucloxacillin               |
| 0.05202 | 0.923 | 68  | allopurinol                                            |
| 0.00042 | 1.000 | 1   |                                                        |
| 0.14970 | 1.000 | 52  |                                                        |
| 0.14960 | 0.932 | 21  |                                                        |
| 0.00104 | 0.954 | 1   |                                                        |
| 0.00019 | 1.000 | 1   |                                                        |
| 0.00872 | 1.000 | 70  |                                                        |
| 0.22120 | 1.000 | 27  |                                                        |
| 0.05206 | 0.979 | 100 |                                                        |
| 0.07917 | 1.000 | 3   |                                                        |
| 0.08977 | 0.960 | 1   |                                                        |
| 0.06635 | 0.999 | 27  |                                                        |
| 0.06041 | 1.000 | 23  |                                                        |
| 0.00571 | 0.976 | 33  |                                                        |
| 0.00849 | 0.945 | 10  |                                                        |
| 0.10490 | 0.994 | 48  | psoriasis                                              |
| 0.17120 | 1.000 | 156 |                                                        |
| 0.00505 | 0.854 | 2   | age-related macular degeneration                       |
| 0.14680 | 0.989 | 182 |                                                        |



|         |       |     |                                                                                                                                                                                          |
|---------|-------|-----|------------------------------------------------------------------------------------------------------------------------------------------------------------------------------------------|
| 0.00985 | 1.000 | 73  |                                                                                                                                                                                          |
| 0.00848 | 1.000 | 93  |                                                                                                                                                                                          |
| 0.00118 | 1.000 | 1   |                                                                                                                                                                                          |
| 0.00014 | 1.000 | 1   |                                                                                                                                                                                          |
| 0.10510 | 0.961 | 109 |                                                                                                                                                                                          |
| 0.00382 | 0.975 | 2   |                                                                                                                                                                                          |
| 0.00928 | 0.995 | 1   |                                                                                                                                                                                          |
| 0.01282 | 1.000 | 1   |                                                                                                                                                                                          |
| 0.03666 | 0.999 | 3   |                                                                                                                                                                                          |
| 0.01645 | 1.000 | 5   |                                                                                                                                                                                          |
| 0.05749 | 1.000 | 41  |                                                                                                                                                                                          |
| 0.04289 | 0.985 | 11  |                                                                                                                                                                                          |
| 0.01431 | 1.000 | 95  |                                                                                                                                                                                          |
| 0.04557 | 1.000 | 18  |                                                                                                                                                                                          |
| 0.03728 | 0.995 | 9   |                                                                                                                                                                                          |
| 0.00787 | 1.000 | 39  |                                                                                                                                                                                          |
| 0.00019 | 1.000 | 1   |                                                                                                                                                                                          |
| 0.00259 | 1.000 | 8   |                                                                                                                                                                                          |
| 0.00104 | 1.000 | 35  |                                                                                                                                                                                          |
| 0.02414 | 1.000 | 78  |                                                                                                                                                                                          |
| 0.02133 | 0.971 | 65  | coronary heart disease, dupuytren's disease,<br>dermatomyositis                                                                                                                          |
| 0.04559 | 1.000 | 20  |                                                                                                                                                                                          |
| 0.04289 | 0.993 | 23  | autoimmune neuropathy, tolgren's,<br>polymyositis, encephalomyelitis                                                                                                                     |
| 0.00255 | 1.000 | 2   |                                                                                                                                                                                          |
| 0.11170 | 1.000 | 16  | end-stage renal disease , hashimoto's                                                                                                                                                    |
| 0.04257 | 0.805 | 1   |                                                                                                                                                                                          |
| 0.02320 | 0.823 | 1   |                                                                                                                                                                                          |
| 0.09231 | 1.000 | 27  | rheumatic heart disease, chlorpromazine-                                                                                                                                                 |
| 0.08078 | 0.940 | 2   |                                                                                                                                                                                          |
| 0.06053 | 0.863 | 73  |                                                                                                                                                                                          |
| 0.15460 | 1.000 | 14  | gelatin allergy , antineutrophil cytoplasmic<br>antibody-associated vasculitis                                                                                                           |
| 0.01507 | 1.000 | 39  |                                                                                                                                                                                          |
| 0.06430 | 1.000 | 1   |                                                                                                                                                                                          |
| 0.11370 | 1.000 | 5   |                                                                                                                                                                                          |
| 0.00307 | 1.000 | 1   |                                                                                                                                                                                          |
| 0.04991 | 0.858 | 2   |                                                                                                                                                                                          |
| 0.01450 | 0.938 | 17  |                                                                                                                                                                                          |
| 0.03546 | 0.940 | 10  |                                                                                                                                                                                          |
| 0.00444 | 0.970 | 1   |                                                                                                                                                                                          |
| 0.05522 | 0.903 | 1   |                                                                                                                                                                                          |
| 0.02249 | 1.000 | 1   |                                                                                                                                                                                          |
|         |       |     | bronchopulmonary aspergillosis, keloid,<br>leprosy, late onset myasthenia gravis,<br>multiple sclerosis, goodpastures syndrome ,<br>allergic bronchopulmonary<br>aspergillosis, glaucoma |
| 0.15910 | 1.000 | 11  |                                                                                                                                                                                          |
| 0.13210 | 0.842 | 3   |                                                                                                                                                                                          |

|         |       |    |                                                                                            |
|---------|-------|----|--------------------------------------------------------------------------------------------|
| 0.02587 | 0.853 | 5  |                                                                                            |
| 0.02615 | 0.957 | 16 |                                                                                            |
| 0.02624 | 0.932 | 11 | melioidosis                                                                                |
| 0.12500 | 1.000 | 15 | chronic hepatitis C, dermatitis herpetiformis,<br>iga deficiency, irritable bowel syndrome |
| 0.04351 | 0.920 | 22 |                                                                                            |
| 0.08337 | 1.000 | 7  |                                                                                            |
| 0.42450 | 1.000 | 6  | alopecia areata, creutzfeldt-jakob disease,<br>pollen allergy, latex allergy               |
| 0.20640 | 0.998 | 4  |                                                                                            |
| 0.05772 | 0.952 | 48 |                                                                                            |
| 0.16330 | 0.925 | 4  |                                                                                            |
| 0.04765 | 1.000 | 28 |                                                                                            |
| 0.03347 | 1.000 | 2  |                                                                                            |
| 0.14350 | 1.000 | 8  |                                                                                            |
| 0.04545 | 1.000 | 56 |                                                                                            |
| 0.05514 | 1.000 | 4  | moyamoya disease                                                                           |
| 0.04130 | 0.928 | 15 |                                                                                            |
| 0.30220 | 0.812 | 1  |                                                                                            |
| 0.09386 | 1.000 | 8  |                                                                                            |
| 0.10710 | 0.999 | 3  | narcolepsy, gastric cancer                                                                 |
| 0.01511 | 0.910 | 7  | peanut allergy                                                                             |
| 0.01871 | 0.980 | 30 | nonalcoholic fatty liver disease                                                           |
| 0.57670 | 1.000 | 23 |                                                                                            |
| 0.04415 | 0.857 | 1  |                                                                                            |
| 0.27860 | 1.000 | 1  | abdominal aortic aneurysm                                                                  |
| 0.13400 | 1.000 | 5  |                                                                                            |
| 0.08687 | 1.000 | 5  |                                                                                            |
| 0.07277 | 1.000 | 3  | breast cancer                                                                              |
| 0.18460 | 1.000 | 7  | lung adenocarcinoma, pollen-induced<br>allergic rhinitis                                   |
| 0.10170 | 1.000 | 1  |                                                                                            |
| 0.00524 | 1.000 | 1  |                                                                                            |
| 0.10760 | 1.000 | 9  |                                                                                            |
| 0.06774 | 0.916 | 2  |                                                                                            |
| 0.00290 | 1.000 | 1  |                                                                                            |
| 0.00547 | 1.000 | 1  |                                                                                            |
| 0.00042 | 1.000 | 1  |                                                                                            |
| 0.05824 | 0.913 | 3  |                                                                                            |
| 0.25460 | 0.946 | 2  |                                                                                            |
| 0.05375 | 0.949 | 2  |                                                                                            |
| 0.09987 | 0.872 | 5  |                                                                                            |
| 0.05189 | 1.000 | 10 |                                                                                            |
| 0.36170 | 0.964 | 46 |                                                                                            |
| 0.01473 | 0.958 | 1  | hepatitis C virus-associated hypertrophic<br>cardiomyopathy                                |
| 0.04253 | 0.858 | 1  |                                                                                            |
| 0.00189 | 1.000 | 5  |                                                                                            |

|          |         |     |        |
|----------|---------|-----|--------|
| 0.04629  | 0.988   | 38  |        |
| 0.00791  | 0.964   | 39  |        |
| 0.01071  | 0.956   | 7   |        |
| 0.00229  | 1.000   | 1   |        |
| 0.1394   | 0.9602  | 105 |        |
| 0.03394  | 0.85781 | 8   |        |
| 0.111    | 0.78    | 2   |        |
| 0.1348   | 0.83996 | 1   |        |
| 0.008005 | 0.85144 | 24  |        |
| 0.1871   | 0.96619 | 12  |        |
| 0.05942  | 0.99212 | 76  |        |
| 0.07208  | 0.84669 | 7   |        |
| 0.05556  | 0.88431 | 136 |        |
| 0.03878  | 0.91713 | 6   |        |
| 0.01409  | 0.91048 | 43  |        |
| 0.39390  | 1.000   | 88  |        |
| 0.59890  | 1.000   | 78  |        |
| 0.11350  | 1.000   | 7   | asthma |
| 0.48540  | 1.000   | 25  |        |
| 0.00112  | 1.000   | 1   |        |
| 0.00608  | 1.000   | 9   |        |
| 0.04015  | 0.9332  |     | 9      |
| 0.09245  | 0.9801  |     | 21     |
| 0.05492  | 0.88386 |     | 3      |
| 0.007578 | 0.92578 |     | 16     |
| 0.0557   | 1       | 21  |        |
| 0.0379   | 0.89424 | 1   |        |
| 0.651    | 0.92595 | 2   |        |
| 0.331    | 0.99501 | 2   |        |
| 0.01736  | 1       | 74  |        |
| 0.3545   | 1       | 9   |        |
| 0.4525   | 0.97309 | 5   |        |
| 0.1744   | 0.82813 | 4   |        |
| 0.008888 | 0.89878 | 2   |        |
| 0.05714  | 1       | 1   |        |
| 0.07758  | 0.90903 | 5   |        |
| 0.005847 | 0.88073 | 10  |        |
| 0.07695  | 0.98125 | 4   |        |
| 0.02035  | 0.99295 | 9   |        |
| 0.7172   | 1       | 18  |        |
| 0.01681  | 1       | 35  |        |
| 0.2659   | 0.91596 | 14  |        |
| 0.01656  | 1       | 7   |        |
| 0.4023   | 1       | 1   |        |
| 0.3076   | 1       | 5   |        |
| 0.4037   | 0.86346 | 8   |        |

|         |          |     |
|---------|----------|-----|
| 0.1985  | 1        | 42  |
| 0.325   | 0.99772  | 36  |
| 0.03977 | 1        | 97  |
| 0.4203  | 0.93402  | 63  |
| 0.1281  | 0.99422  | 206 |
| 0.01423 | 1        | 98  |
| 0.0109  | 1        | 32  |
| 0.2405  | 0.90807  | 42  |
| 0.07294 | 0.86215  | 69  |
| 0.03634 | 1        | 102 |
| 0.4909  | 1        | 8   |
| 0.05936 | 1        | 6   |
| 0.04281 | 0.892333 | 92  |
| 0.01271 | 0.872066 | 27  |
| 0.01558 | 0.97697  | 124 |
| 0.1759  | 0.815132 | 5   |
| 0.09393 | 0.860421 | 11  |
| 0.5452  | 1        | 28  |
| 0.4132  | 1        | 31  |
| 0.01247 | 1        | 96  |
| 0.5561  | 0.97858  | 32  |
| 0.06183 | 1        | 84  |
| 0.3796  | 1        | 50  |
| 0.1638  | 0.94073  | 124 |
| 0.8247  | 0.93571  | 143 |
| 0.782   | 0.81047  | 2   |
| 0.1773  | 0.85807  | 4   |
| 0.02468 | 1        | 2   |
| 0.1741  | 1        | 1   |
| 0.01681 | 0.86376  | 1   |
| 0.3033  | 0.91827  | 4   |

## **Pubmed ID**

21422676 , 22258792 , 18418397

16998491

21428769

17176470 , 17498269

16998491, 22590570

20831525 , 20235790

22879410,23749180

16948645

25062414, 24308748, 10090614

18184080, 19483685  
24732692

25087609

18515573

20842443,22991974,22886382

20933106 , 18513341 , 14511932 , 25339670

24603486 , 19254248 , 9698788 , 18256425

23886662 , 12197571,17578052,9451597,3496181

11312025 , 25030430

11031343,18976433,20003324,22590574,24278027,18502098  
, 17561243,16005081

9757914

18028350 , 18028350,22291608,21490506

21692766,3532932,9641569,12209103

9409445

11179016 , 15691311

23443026

25156535

17182961

21245432

20061363, 14990915

18186799



21814517
