# Supplementary material for: Association of HLA-B Gene Polymorphisms with Type 2 Diabetes in Pashtun Ethnic Population of Khyber Pakhtunkhwa, Pakistan
Source: J Diabetes Res. 2021 Jun 16;2021:6669731. doi: 10.1155/2021/6669731 (PMC8254654; doi:10.1155/2021/6669731)
Supplement: Supplementary Materials — Resultant file was filtered for T2D susceptible genes (supplementary file 1). It has three main classes: class I HLAs (A, B, and C), class II HLAs (DQ, DM, DP, DR, and DO), and class III HLAs (CSK2B, SKI2W, C4B, and PBX2) (supplementary file 2). [file 6669731.f1.zip]

Archive with 2 entries (2 files):
- 6669731.f1/6669731.f1.pdf
- 6669731.f1/6669731.f2.pdf
